# Supplementary material for: CXCR3 Provides a Competitive Advantage for Retention of Mycobacterium tuberculosis-Specific Tissue-Resident Memory T Cells Following a Mucosal Tuberculosis Vaccine
Source: MDPI journal article supplement (doi:10.3390/vaccines11101549), 2023-09-29
Supplement: s1 [file s1]

Armitage E., et al, CXCR3 provides competitive advantage for retention of *M. tuberculosis*-specific tissue resident memory T cells following a mucosal tuberculosis vaccine.

## Supplementary Material

### 1 Supplementary Figures and Tables

#### 1.1 Supplementary Figures

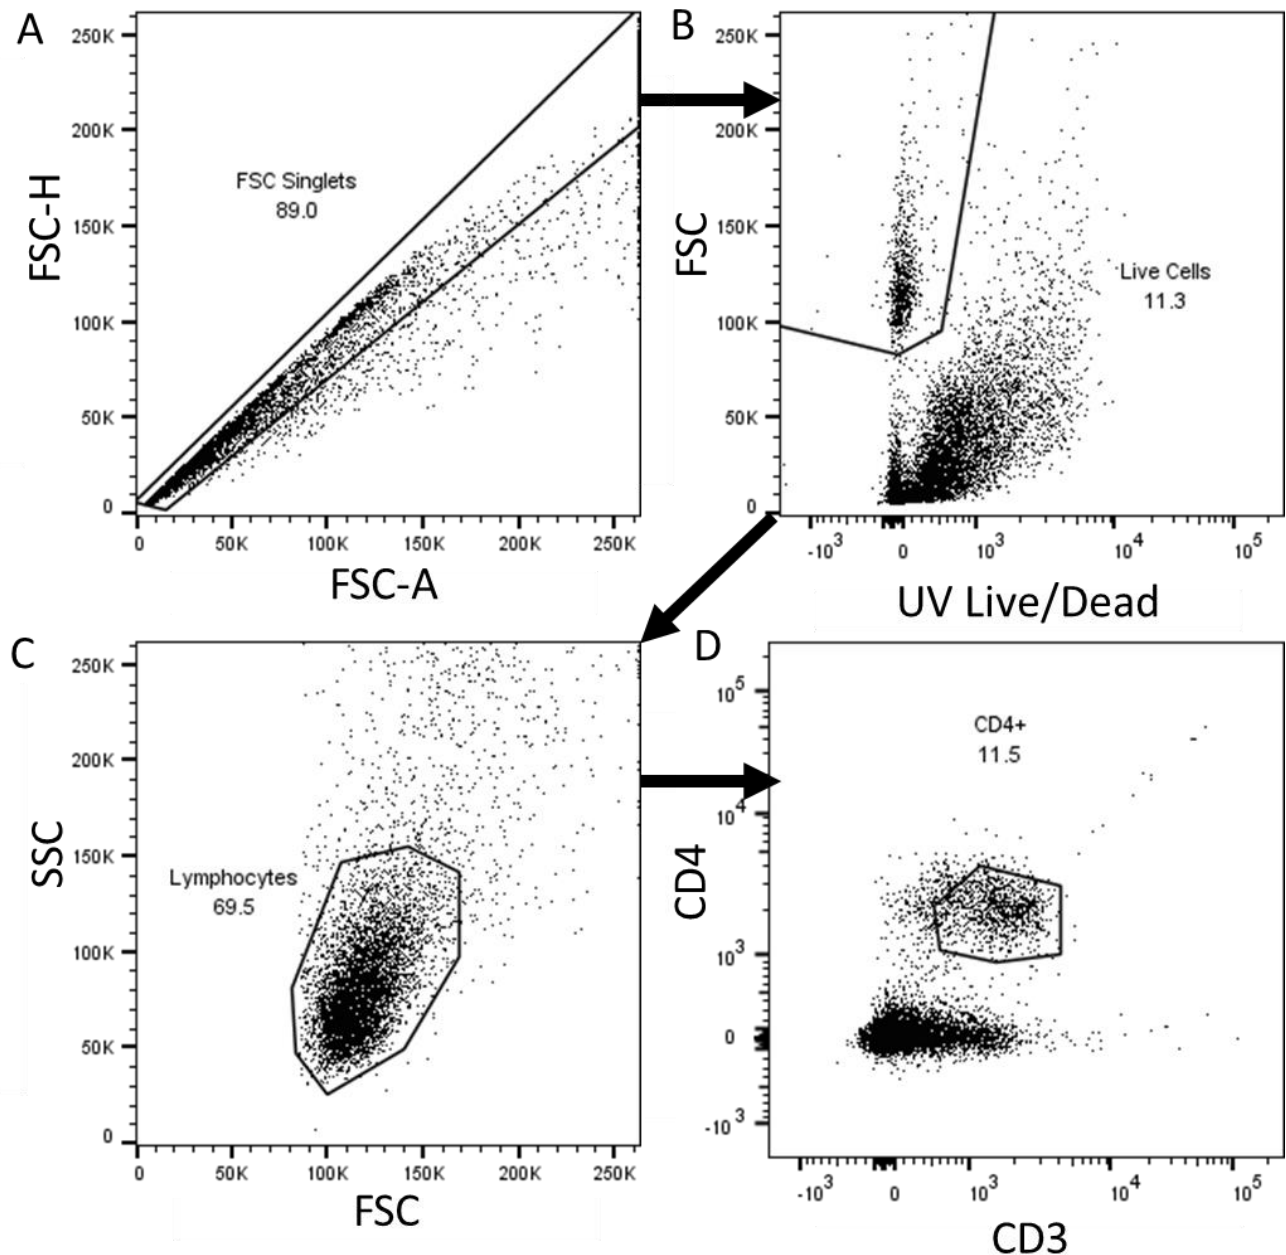

**Figure S1.** Gating strategy for flow cytometry analysis. (A) Exclusion of doublets based on differences between forward scatter area and height. (B) Exclusion of dead cells and debris using UV Live/Dead staining. (C) Gating of lymphocytes. (D) Gating of CD3<sup>+</sup> CD4<sup>+</sup> T cells.

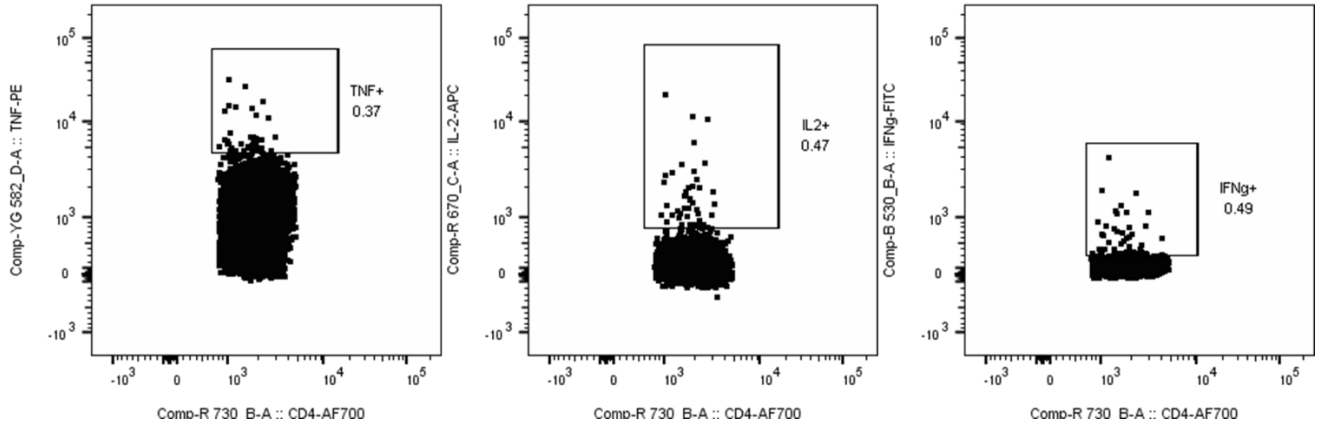

**Figure S2.** Gating strategy for flow cytometry ICS analysis. CD3<sup>+</sup> CD4<sup>+</sup> T lymphocytes that were stained by ICS to identify cells that expressed IFN- $\gamma$  (A), TNF- $\alpha$  (B) and IL-2 (C). Boolean gating was used to identify cells that expressed multiple or single cytokines.

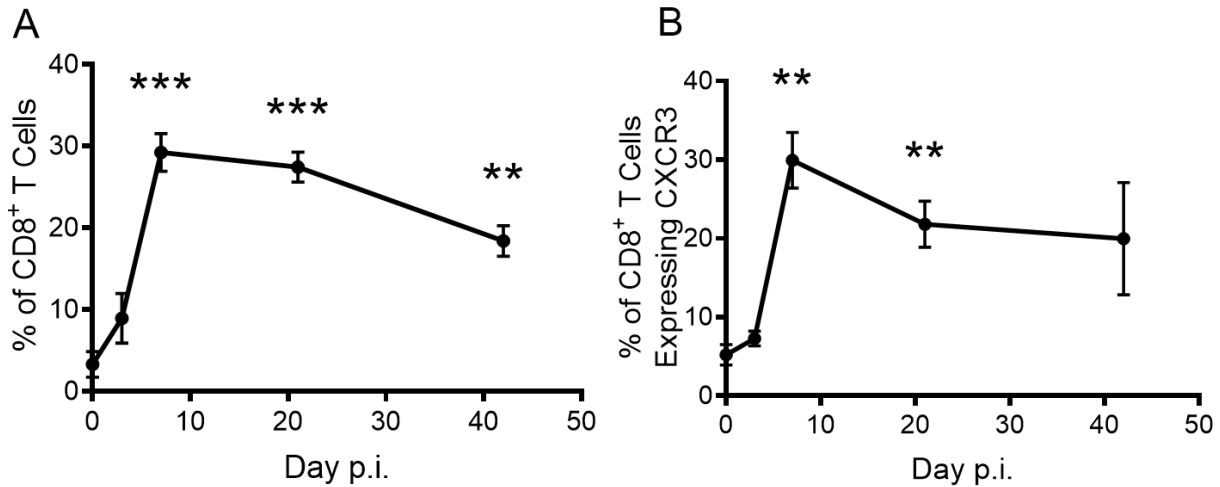

**Figure S3.** CXCR3-eGFP expression by pulmonary CD8<sup>+</sup> T cells following PR8.p25 immunization. CiBER<sup>+/−</sup> mice (n = 3-4) were immunized with 20 pfu PR8.p25 i.n. and pulmonary lymphocytes were isolated 3, 7, 21 or 42 days post-immunization. CD8<sup>+</sup> T cells (A) and CXCR3<sup>+</sup> CD8<sup>+</sup> T cells (B) were quantified following immunization. Data are shown as the means  $\pm$  SEM. The significance of differences between the initial and later time points was determined by one-way ANOVA with multiple comparisons testing (\*\*P<0.01, \*\*\*P<0.001).

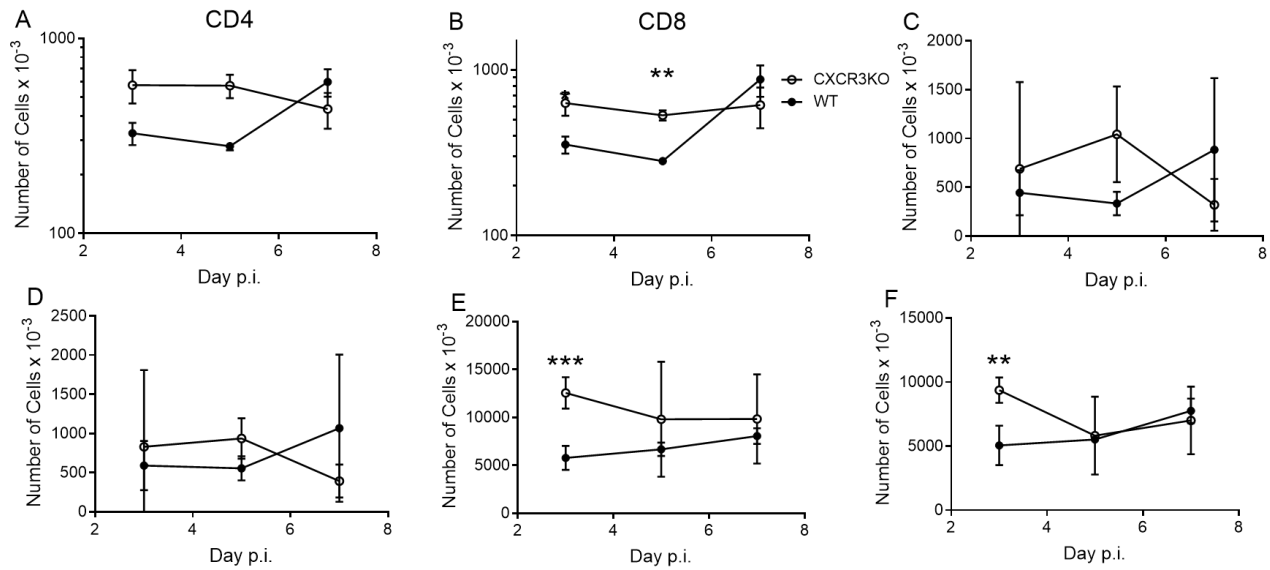

**Figure S4.** Early lymphocyte response of CXCR3<sup>-/-</sup> mice to PR8.p25 immunization. CXCR3<sup>-/-</sup> (open circle) and WT (closed circle) mice (n = 4) were immunized with PR8.p25 (20 pfu) and lymphocytes were isolated from their lungs, MLNs and spleens at 3, 5 and 7 days post-immunization and analyzed by flow cytometry. CD4<sup>+</sup> and CD8<sup>+</sup> T cells were measured in their lungs (A-B), MLNs (C-D) and spleens (E-F). Data are shown as the means  $\pm$  SEM. The significance of differences between the groups was determined by Student's t-test (\*\*P<0.01, \*\*\*P<0.001).

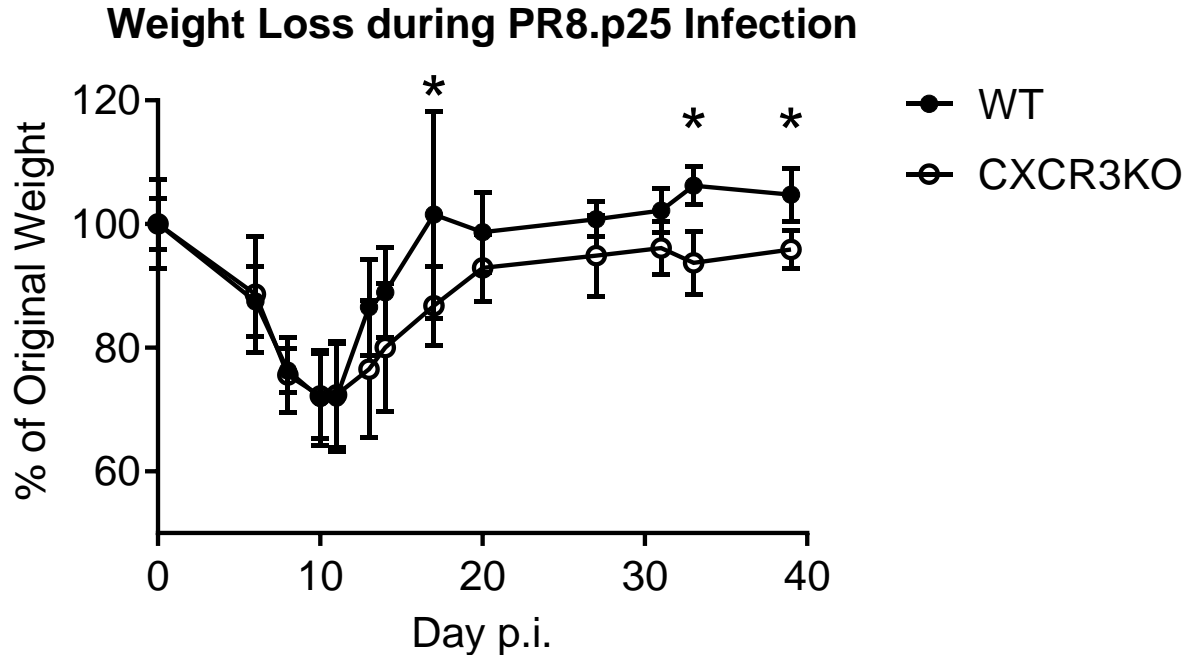

**Figure S5.** CXCR3<sup>-/-</sup> mice show similar systemic responses to PR8.p25 infection. CXCR3<sup>-/-</sup> and C57BL/6 WT mice were immunized with 20 pfu PR8.p25 i.n. and weighed following infection. Data are shown as the mean % of original weight  $\pm$  SEM. The significance of differences between the groups was determined by Student's t-test (\*P<0.05).
